# Supplementary material for: Mechanisms contributing to patients’ demand for low back pain imaging: a complex systems approach
Source: Research Square preprint supplement (doi:10.21203/rs.3.rs-8393306/v1), 2026-01-25
Supplement: Supplementary file 1 [file 203b19ce8d27be1d4bd36984.docx]

Appendix 1 Topic list based on scoping review (Fraser et al., 2024)

| **Factor** | **Definition** |
| --- | --- |
| Cognitive biases | A systematically occurring tendency to think, act or feel in a certain manner, caused by processing and interpreting information derived from individual experiences and preferences. |
| Anchoring effect | Anchoring effect occurs when patients rely on initially found or received information, instead of relying on evidence that is of a higher quality but also more difficult to find. |
| Anticipated regret aversion bias | Anticipated regret aversion bias includes instances where patients strive to avoid possible regret in the future by demanding unnecessary care in the present. |
| Asymmetry of risks and benefits bias | Asymmetry of risks and benefits bias is a tendency of patients to overestimate the benefits and underestimate the risks of low-value care treatments. |
| Confirmation bias | The confirmation bias occurs when patients seek or interpret medical information or care recommendations that correspond to their viewpoints, and disregard or dispute contradicting recommendations and information. Furthermore, patients influenced by this bias can prefer more healthcare than needed, and ignore, reject, or give less attention to information about the harms of screening and overdiagnosis. |
| Extension bias | The extension bias is the tendency of patients to perceive more healthcare as better than less healthcare. Patients incentivized by this bias can demand excessive, unnecessary, and even harmful care. |
| Imperative action bias | Patients with this bias feel obliged to act because action is better than inaction. |
| Imperative knowledge bias | A tendency of patients to gain more information related to their health status, because this is better than being ignorant. Therefore, patients tend to think that to know is better than not to know. This bias occurs primarily in the field of diagnostics, and usually leads to overdiagnosis. |
| Loss aversion | Loss aversion occurs when patients overvalue low-value care options and experience discomfort with losing a preferred care option. These patients tend to continue demanding low-value care even when physicians do not recommend this, because the losses loom larger than the gains. |
| Prominence effect | Patients can perceive medical decision-making as complex and challenging because of numerous factors that must be considered. Because of this, patients may try to resolve this complexity by focusing on a single aspect that for some reason is salient to them. |
| Risk aversion | A tendency of patients to avoid or reduce uncertainties, dangerous situations, and risks as much as possible |
|  |  |
| **Emotions** | Research in the domain of psychology has long established that many types of (health-related) behaviors are to a significant extent driven by emotions. |
| Fear and anxiety | Being afraid of illness, overlooking potential diseases, or possible outcomes of diseases. To reduce these fears and anxieties, patients are more likely to demand low-value care. |
| Need for control | Patients strive to assert control over their situation by displaying an active role in their decision-making process. For example, patients might try to gather as much information as they can regarding their situation and act upon it by demanding care, even when this is unnecessary. |
| Perceived insecurity | Perceived insecurity causes patients to feel uncertain about their health status. Patients then may wish to reassure themselves by demanding care, including low-value care. |
|  |  |
| **Preferences and expectations** | Personal convictions and past experiences of patients associated with the demand low-value care. |
| Beliefs | Patients’ beliefs are formed by personal convictions, which function as cornerstones that shape patients’ attitudes, preferences, and expectations towards medical care. These beliefs tend to make patients susceptible to perceive low-value care as a default or necessary treatment, which causes these patients to demand low-value care. |
| Experiences | Past events that shape or influence their preferences and expectations to demand medical care. |
|  |  |
| **Knowledge-related factors** | All information and education-related factors that drive patients to demand low-value care. |
| Cognitive limitation | When patients lack sufficient ability to comprehend information about low-value care treatments and services. For example, patients lacking sufficient knowledge, tertiary education, or (medical) health literacy can demand low-value care However, there are also examples of patients with higher education levels demanding low-value care. |
| Over-informed | Instances where patients possess too much information, resulting in a sense of data overload and wrongful healthcare decision-making. |
| Unawareness | In some cases, patients lack realization and information that certain treatments have no or only marginal health benefits and are possibly even harmful. Because of their ‘unawareness’ patients are often surprised to learn about the downsides of interventions characterized as low-value care. |
| Not accepting the concept of overuse | Tendencies of patients to reject or question the credibility of evidence-based recommendations and overuse messaging to avoid low-value care interventions, such as overtreatment and overdiagnosis |
|  |  |
| **Interaction with the healthcare provider** | All factors related to the interaction with healthcare providers that result in the demand for low-value care |
| Acceptance of care recommended by the provider | Instances where patients adhered to low-value care recommendations provided by their healthcare providers |
| Lack of trust in the provider | It is hypothesized that patients sometimes have less trust in the diagnostic capabilities of the primary care physician than of medical specialists and, therefore, ask to be referred to a medical specialist. |
|  |  |
| **Socio-cultural factors** | All factors related to social or cultural incentives for patients to demand low-value care. |
| Entitlement to care | The idea that patients perceive healthcare as a right. For instance, patients justify low-value care demand when healthcare is experienced as costly. Because of this, patients have higher expectations of care and are more willing to consume unnecessary and excessive healthcare. In other cases, the existence of public standards or social norms determine this sense of care entitlement. |
| Social network | Instances where relatives and acquaintances pressure or encourage patients to seek low-value care. |
| Stage of life | Age- and life phase related factors that result in patients’ low-value care demand. For example, some individuals perceive that being young of age justifies more aggressive unnecessary treatment. |
|  |  |
| **Biomedical and care-related factors** | Factors on the intersection of biology, care services and medicine. |
| Duration of symptom or illness | The idea that a persisting or reoccurring medical problem, symptom, or disease, contributes to excessive demand for low-value care. |
| Maximization of length and quality of life | The wish of patients to live as long as possible at any cost, and to maintain or improve their current quality of life. |
| Pain | Pain experienced by patients was observed to be a factor for the prescription of inappropriate medication and unnecessary treatment by the provider. |
| Severity and number of health threats | Patients experiencing multimorbidity, severe symptoms or illnesses have an increased tendency to demand low-value care. |
| Ease of use | The idea of demanding care because it is convenient (e.g., nearby), time efficient, or perceiving other options as uncomfortable by the patient. These reasons may contribute to the appeal and demand of various types of low-value care by patients. |
|  |  |
| **Economic factors** | Factors relating to the consumption of low-value care for financial reasons or to satisfy needs and wants of patients. |
| Consumerism | The idea that healthcare is perceived as a consumption good, and patients can, therefore, shop around by visiting various healthcare providers to receive their desired care. |
| Present and future income effects | The need of patients to function at work to earn money and support their family. For this reason, patients are more likely to request low-value care when they are injured or sick |
| Marketing | When information is presented in such a manner that it generates profits for the presenting actor and causes patients to demand low-value care. In some cases, campaigns or advertisements expose consumers solely to the potential benefits of low-value care services. In other cases, patients are misled by awareness campaigns about certain medical conditions overemphasizing the number of patients suffering from a certain disease. Consequently, in the eyes of the public, some diseases are perceived as more common or more serious than they actually are. |
| Insurance coverage | Demanding low-value care because it is covered by patients’ insurance and, therefore, patients do not directly bear the financial consequences of care use. |

**Appendix 2 – Topic list based on literature search concerning Low back pain imaging
(see page 5-20 for the search strategy, flow chart, and thematic analysis of the included literature)**

Figure 1: Topic list based on literature search that identifies factors associated with patients’ demand for low back pain imaging

| **Factor** | **Definition** |
| --- | --- |
| Cognitive biases | A systematically occurring tendency to think, act or feel in a certain manner, caused by processing and interpreting information derived from individual experiences and preferences. |
| Anticipated regret aversion bias | Anticipated regret aversion bias includes instances where patients strive to avoid possible regret in the future by demanding unnecessary care in the present. |
| Asymmetry of risks and benefits bias | Asymmetry of risks and benefits bias is a tendency of patients to overestimate the benefits and underestimate the risks of low-value care treatments, such as low back pain imaging. |
| Confirmation bias | The confirmation bias occurs when patients seek or interpret medical information or care recommendations that correspond to their viewpoints, and disregard or dispute contradicting recommendations and information. Furthermore, patients influenced by this bias can prefer more healthcare than needed, and ignore, reject, or give less attention to information about the harms of screening and overdiagnosis. |
| Extension bias | The extension bias is the tendency of patients to perceive more healthcare as better than less healthcare. Patients incentivized by this bias can demand excessive, unnecessary, and even harmful care. |
| Imperative action bias | Patients with this bias feel obliged to act because action is better than inaction. |
| Imperative knowledge bias | A tendency of patients to gain more information related to their health status, because this is better than being ignorant. Therefore, patients tend to think that to know is better than not to know. This bias occurs primarily in the field of diagnostics, and usually leads to overdiagnosis. |
| Risk aversion | A tendency of patients to avoid or reduce uncertainties, dangerous situations, and risks as much as possible |
|  |  |
| **Emotions** | Research in the domain of psychology has long established that many types of (health-related) behaviors are to a significant extent driven by emotions. |
| Fear and anxiety | Being afraid of illness, overlooking potential diseases, or possible outcomes of diseases. To reduce these fears and anxieties, patients are more likely to demand low-value care, such as low back pain imaging. |
| Hope | A forward-looking emotional state where individuals believe that their current circumstances will improve. |
| Perceived insecurity | Perceived insecurity causes patients to feel uncertain about their health status. Patients then may wish to reassure themselves by demanding care, including low back pain imaging. |
|  |  |
| **Preferences and expectations** | Personal convictions and past experiences of patients associated with the demand for low back pain imaging. |
| Beliefs | Patients’ beliefs are formed by personal convictions, which function as cornerstones that shape patients’ attitudes, preferences, and expectations towards medical care. These beliefs tend to make patients susceptible to perceive low back pain imaging as a default or necessary treatment, which causes these patients to demand imaging |
| Experiences | Past events that shape or influence their preferences and expectations to demand medical care. |
|  |  |
| **Knowledge-related factors** | All information and education-related factors that drive patients to demand low-value care, such as low back pain imaging. |
| Limited health literacy | Limited health literacy arises when patients lack sufficient ability to comprehend information about low-value care treatments and services. For example, patients lacking sufficient knowledge, tertiary education, or (medical) health literacy can demand low-value care, such as unnecessary imaging for low back pain |
| Over-informed | Instances where patients possess too much information, resulting in a sense of data overload and wrongful healthcare decision-making. |
| Unawareness | In some cases, patients lack realization and information that certain treatments have no or only marginal health benefits and are possibly even harmful. Because of their ‘unawareness’ patients are often surprised to learn about the downsides of interventions characterized as low-value care (e.g. low back pain imaging). |
| Low education level | Patients with a degree that is valued as belove average. This may make it challenging for patients to understand health-related information from providers concerning their low back pain. |
|  |  |
| **Interaction with the healthcare provider** | All factors related to the interaction with healthcare providers that result in the demand for low-value care, such as low back pain imaging |
| Acceptance of care recommended by the provider | Instances where patients adhered to low back pain imaging recommendations provided by their healthcare providers |
| Lack of trust in the provider | It is hypothesized that patients sometimes have less trust in the diagnostic capabilities of the primary care physician than of medical specialists and, therefore, ask to be referred to a medical specialist. |
| Lack of time | When physicians do not have enough time or have to rush their consultation session with patients. It takes time to explain why physicians would not request imaging. In some cases it may even be quicker to perform imaging than taking the time to explain this to patients. |
| Perception of medical competency | Perception of patients about the capacities of healthcare providers. |
| Practice variation | Differences in recommendations of care by various healthcare providers. |
| Support from the provider | When patients feel heard by their physicians when they explain their problem. |
|  |  |
| **Socio-cultural factors** | All factors related to social or cultural incentives for patients to demand low back pain imaging. |
| Cultural background | The influence of foreign medical practices that influence patients to demand low back pain imaging. |
| Social network | Instances where relatives and acquaintances pressure or encourage patients to seek low back pain imaging. |
| Stage of life | Age- and life phase related factors that result in patients’ demand for low back pain imaging. For example, some individuals perceive that being young of age justifies more aggressive unnecessary treatment. |
|  |  |
| **Biomedical and care-related factors** | Factors on the intersection of biology, care services and medicine. |
| Chronic problem | Long-lasting or recurring pain experienced by patients with low back pain. (According to the literature this was often the case when LBP is experienced for longer than 12 weeks. |
| Comorbidity | Patients experiencing multiple (severe) symptoms or illnesses. |
| Disability | A functional impairment caused by a patient´s LBP severity. |
| Finding the cause | Instances where patients try to find the cause of their low back pain by demanding imaging. |
| Follow-up treatments decisions | Demanding imaging by patients is often done to receive a referral to specialists or guidance on how to treat their low back pain. |
| Pain | Pain (and its severity) experienced by patients was observed to be a factor to demand or recommend low back pain imaging. |
|  |  |
| **Economic factors** | Factors relating to the consumption of low back pain imaging for financial reasons or to satisfy needs and wants of patients. |
| Consumerism | The idea that healthcare is perceived as a consumption good, and patients can, therefore, shop around by visiting various healthcare providers to receive their desired care. |
| Present and future income effects | The need of patients to function at work to earn money and support their family. For this reason, patients are more likely to request low back pain imaging when they are injured or sick |
| Marketing | When information is presented in such a manner that it generates profits for the presenting actor and causes patients to demand low back pain imaging. In some cases, campaigns or advertisements expose consumers solely to the potential benefits of imaging. In other cases, patients are misled by awareness campaigns about certain medical conditions overemphasizing the number of patients suffering from a certain disease. Consequently, in the eyes of the public, some diseases are perceived as more common or more serious than they actually are. |

**Literature search and search strategy**

**Table 1**

*Query strategy for the literature, conducted on the 13th of February 2023 in Embase*

| **No.** | **Query** | **Results** |
| --- | --- | --- |
| #23 | #18 OR #22 | 218 |
| #22 | #5 AND #21 | 35 |
| #21 | #19 OR #20 | 182 |
| #20 | (('low value' OR 'low-value') NEAR/2 'imaging'):ti,ab | 74 |
| #19 | ('overuse' NEAR/2 'imaging'):ti,ab | 110 |
| #18 | #5 AND #10 AND #17 | 191 |
| #17 | #11 OR #12 OR #13 OR #14 OR #15 OR #16 | 360242 |
| #16 | (('adher*' OR 'complian*' OR 'comply' OR 'complies*' OR 'follow') NEAR/2 ('guideline*' OR 'protocol*')):ti,ab | 26106 |
| #15 | (('adher*' OR 'complian*' OR 'comply' OR 'complies*' OR 'follow') NEAR/3 ('guideline*' OR 'protocol*')):ti | 5365 |
| #14 | ((('overuse' OR 'underuse') NEAR/3 ('health*' OR 'care' OR 'medicin*')):ti,ab) OR 'cost ineffective care':ti,ab OR 'unnecessary care':ti,ab | 1118 |
| #13 | (('low value' OR 'low-value') NEAR/2 ('care' OR 'health' OR 'servic*')):ti,ab | 822 |
| #12 | ('patient*' NEAR/3 ('need' OR 'needs' OR 'preferenc*' OR 'attitud*' OR 'educat*' OR 'satisf*' OR 'demand*' OR 'experience*' OR 'belief*' OR 'expectation*' OR 'desire*')):ti | 67703 |
| #11 | 'patient compliance'/exp OR 'patient preference'/exp OR 'patient attitude'/de | 275258 |
| #10 | #6 OR #7 OR #8 OR #9 | 1898587 |
| #9 | 'spine radiography'/exp | 21232 |
| #8 | 'diagnostic imaging'/exp OR 'imaging'/exp OR 'nuclear magnetic resonance imaging'/exp OR 'whole body imaging'/exp OR 'x-ray computed tomography'/exp | 1582886 |
| #7 | 'imaging and display'/exp/mj | 579307 |
| #6 | (('spinal' OR 'diagnostic' OR 'mri' OR 'ct') NEAR/2 ('imaging*' OR 'scan' OR 'scans' OR 'scanning')):ti,ab | 419922 |
| #5 | #1 OR #2 OR #3 OR #4 | 78606 |
| #4 | 'sore lower back':ti,ab OR 'sore lowback':ti,ab | 0 |
| #3 | (('low' OR 'lower') NEAR/2 ('backpain' OR 'backache')):ti,ab | 574 |
| #2 | (('low back' OR 'lower back') NEAR/2 ('pain*' OR 'ache' OR 'aches' OR 'aching')):ti,ab | 48208 |
| #1 | 'low back pain'/exp | 69553 |

**Literature search results**

**Figure 1** *Prisma diagram for the selection of relevant articles*

**Identification of studies via databases**

Articles removed *before screening* by scanning the titles and abstracts:

Duplicate records removed (n = 3)

Articles removed based on their title or content of the abstract (n = 152)

Records identified: (n = 218)

Embase (n = 218)

**Identification**

Articles assessed for eligibility

(n = 63)

Articles excluded:

Reason 1 Non-peer reviewed articles, such as conference abstracts, by inspecting the titles and abstracts (n = 23)

Reason 2 Exclusion of articles that have a focus on opinions, for example, letters, notes, perspectives, editorials, and commentaries by inspecting the title and abstracts (n = 12)

Reason 3 Articles excluded after full inspection, because of the absence of factors associated with patients’ demand for nonspecific low back pain imaging or focus on other factors (n = 10)

**Screening**

Studies included in review

(n = 18)

**Included**

**Factors found in the included literature associated with patients’ demand for imaging.**

| Bron | Soort studie | Factor | Axiale code | Selectieve code |
| --- | --- | --- | --- | --- |
| (Blokzijl et al., 2021) | Focus group interview | Limited perceived involvement in the imaging decision: All patients expressed that the clinician made the decision about imaging. Most described the perception that they had limited to no involvement in this decision-making process: “Because we don’t know if we need to scan or not, once we see the doctor then we find out if [we] need a scan.” | -Acceptance of care recommended by the provider  -Perceived insecurity | -Interaction with the provider  -Emotions |
| (Blokzijl et al., 2021) | Focus group interview | Imaging finds the cause and validates pain. Beliefs and expectations regarding imaging appeared to drive lumbar imaging. | -Finding the cause  -Confirmation bias  -Pain  -Beliefs | -Biomedical and care-related factors  -Cognitive bias  -Biomedical and care-related factors  -Preferences & expectations |
| (Blokzijl et al., 2021) | Focus group interview | The majority of patients expressed faith in imaging to locate the source of low back pain. | -Beliefs  -Finding the cause | -Preferences & expectations  -Biomedical-Biomedical and care-related factors |
| (Blokzijl et al., 2021) | Focus group interview | Patients expressed a belief that imaging would provide certainty about their condition and validate their pain. | -Beliefs  -Perceived insecurity -Confirmation bias  -Pain | -Preferences & expectations -Emotions -Cognitive bias  -Biomedical and care-related factors |
| (Blokzijl et al., 2021) | Focus group interview | Patients mostly discussed the benefits of imaging; perceived harms were limited to radiation exposure. | -Asymmetry of risks and benefits | -Cognitive bias |
| (Blokzijl et al., 2021) | Focus group interview | Participants would justify imaging if: (1) there was severe pain or physical limitation; (2) the pain was not resolving over time despite treatment; (3) they themselves suspected serious pathology; or (4)they felt the current episode of back pain differed from previous episodes: “So, because my problem was not improving with exercise or with physiotherapy, that’s when we went down the path of a CT scan.” | -Pain  -Disability  -Chronic problem  -Beliefs -Experiences | -Biomedical and care-related factors  -Biomedical and care-related factors  -Biomedical and care-related factors  -Preferences & expectations  -Preferences & expectations |
| (Blokzijl et al., 2021) | Focus group interview | External drivers to seek ED care. Requirements from work and insurance companies were also mentioned by some patients to influence their need to seek care in ED and for imaging: “Then because it was a work-cover situation an MRI was ordered.” | -Present and future income effects | -Economic factors |
| (Blokzijl et al., 2021) | Focus group interview | All clinicians perceived the most important driver for imaging in ED was patient pressure and gave examples of these situations: “I’ve definitely had people that have come in and demanded imaging” (Male, Physician - junior) Clinicians described believing this pressure came from a need for information and reassurance, with patients forming expectations for imaging based on previous healthcare encounters, their relatives and/or media sources. | -Unawareness  -Perceived insecurity  -Experiences  -Social network  -Marketing  -Beliefs | -Knowledge-related factors  -Emotions  -Preferences & expectations  -Socio-cultural factors  -Economic factors -Preferences & expectations |
| (Blokzijl et al., 2021) | Focus group interview | Some clinicians also brought up low patient awareness on the potential harms of imaging and unrealistic beliefs of the benefits: “X-rays seem to have a mythical status amongst patients that they can diagnose anything.” (Male, Physician - Senior) | -Unawareness  -Asymmetry of risk and benefits | -Knowledge-related factors  -Cognitive bias |
| (Blokzijl et al., 2021) | Focus group interview | Complex sociodemographic and cultural factors were also raised by some clinicians as potential drivers of patient expectations for imaging in the ED. ‘’‘t’s culturally drilled into them that a little difficulty needs some form of intervention” (Male, Physician—junior) | -Cultural background | -Socio-cultural factors |
| (Blokzijl et al., 2021) | Focus group interview | Some clinicians mentioned system factors such as a need for imaging for an insurance claim as a driver; patients would only be satisfied with the encounter if the insurance-mandated scan was provided. | -Present and future income effects | -Economic factors |
| (Blokzijl et al., 2021) | Focus group interview | Some clinicians described feeling their colleagues may be unable to provide patients with adequate information or reassurance to replace the use of imaging, due to limited experience or knowledge. | -Perceived insecurity  -Perception of medical competency | -Emotions  -Interaction with the provider |
| (Blokzijl et al., 2021) | Focus group interview | Clinicians described some ED specific factors that could drive imaging in this setting. The majority of clinicians mentioned time pressure in the ED to be a driving factor, as it is often quicker to perform imaging than take the time to explain to patients why they would not request imaging | -Lack of time | -Interaction with the provider |
| (Braeuninger-Weimer et al., 2021) | Quantitative research | Musculoskeletal low back pain (MLBP) remains the leading contributor to years lived with disability (Hoy et al., 2014). For most people, there is no cure that can relieve pain permanently, and higher levels of pain-related disability are strongly associated with greater usage of healthcare services (Blyth et al., 2004). | -Pain  -Disability | -Biomedical and care-related factors  -Biomedical and care-related factors |
| (Braeuninger-Weimer et al., 2021) | Quantitative research | The findings suggest that patients' perception of consultation-based reassurance by practitioners is significantly related to subsequent care seeking from general practitioners, wider care seeking from multiple practitioners and distress. | -Beliefs  -Perceived insecurity | -Preferences & expectations  -Emotions |
| (Braeuninger-Weimer et al., 2021) | Quantitative research | The variance accounted for in GP visits and the number of other types of practitioner consulted were small, suggesting that there are other factors indicated in people's choice to re-consult. Some of them have been identified in this study, and are in line with previous research, indicating that higher  levels of pain-related disability are associated with greater healthcare use (Blyth et al., 2004). | -Pain  -Disability | -Biomedical and care-related factors  -Biomedical and care-related factors |
| (Braeuninger-Weimer et al., 2021) | Quantitative research | Similarly, in seeking a second opinion after consulting in an orthopaedic outpatient's clinic, 30% of the 2,880 participants cited poor communication and lack of trust not in the consultant's competence, but in their relationship with the patient. | -Lack of trust in the provider | -Interaction with the provider |
| (Braeuninger-Weimer et al., 2021) | Quantitative research | This is echoed more generally in a review of reassurance provided for patients with non-specific conditions, which suggested that practitioners should be primarily empathic and collaborative to avoid patients feeling misunderstood and subsequently seeking another care option | -Lack of trust in the provider  -Consumerism | -Interaction with the provider  -Economic factors |
| (Braeuninger-Weimer et al., 2021) | Quantitative research | In reference to providing explanations, orthopaedic surgeons have been shown to use a high level of jargon and offer explanations that patients find difficult to follow (Braeuninger-Weimer et al., 2019; Lærum et al., 2006). | -Limited health literacy | -Knowledge-related factors |
| (Braeuninger-Weimer et al., 2021) | Quantitative research | Patients who are uncertain about their condition may continue searching for a diagnosis, which may lead to further healthcare seeking and hence an extra burden on health services (Serbic et al., 2014). | -Perceived insecurity  -Consumerism | -Emotions  -Economic factors |
| (Chou et al., 2018) | Scoping Review | A consistent theme that emerged from patients recruited from general practice, the community and tertiary care was the need to obtain a diagnosis and a cause of the pain | -Finding the cause    -Pain | -Biomedical and care-related factors  -Biomedical and care-related factors |
| (Chou et al., 2018) | Scoping Review | Other reasons for seeking medical care included a need to obtain medications for pain relief, to receive advice and discussion of options for LBP management, to receive sickness certification and legitimation of their back pain | -Unawareness  -Follow-up treatment decisions -Present and future income effects  -Confirmation bias | -Knowledge-related factors  -Biomedical and care-related factors  -Economic factors  -Cognitive bias |
| (Chou et al., 2018) | Scoping Review | Both qualitative and quantitative studies found that patients wanted imaging of their spine to find a diagnosis of their LBP | -Confirmation bias | -Cognitive bias |
| (Chou et al., 2018) | Scoping Review | Hoffman reported that most patients expected their general practitioner to refer them for an x-ray, particularly if they felt that their pain was severe | -Beliefs  -Pain (severity) | -Preferences & expectations  -Biomedical and care-related factors |
| (Chou et al., 2018) | Scoping Review | Amonkar found that more than 60% of participants thought that back x-rays were a positive investigation | -Asymmetry of risks and benefits | -Cognitive bias |
| (Chou et al., 2018) | Scoping Review | Many patients felt that x-rays provided reassurance as well as confirmation of their general practitioner’s diagnosis | -Perceived insecurity -Confirmation bias | -Emotions -Cognitive bias |
| (Chou et al., 2018) | Scoping Review | Furthermore, imaging that showed a physical defect seemed to provide closure and relief for patients and patients sought diagnostic imaging as a means to legitimise their back pain. | -Finding the cause  -Perceived insecurity  -Confirmation bias | -Biomedical and care-related factors  Emotions  -Cognitive bias |
| (Chou et al., 2018) | Scoping Review | Wilson found that radiology utilisation was associated with the severity of back pain and a history of osteoporosis | -Pain (severity)  -Comorbidity | -Biomedical and care-related factors  -Biomedical and care-related factors |
| (Chou et al., 2018) | Scoping Review | Jenkins reported that increased age, lower education level, non-European cultural background, history of previous spinal imaging and negative beliefs about back pain were associated with a perceived need for imaging | -Stage of life -Low education level  -Cultural background  -Experiences  -Beliefs | -Socio-cultural factors  -Knowledge-related factors -Socio-cultural factors  -Preferences & expectations -Preferences & expectations |
| (Chou et al., 2012) | Review | Despite the perception that routine imaging can help alleviate patient anxiety about back pain, routine imaging also was not associated with better psychological outcomes. | -Fear and anxiety | -Emotions |
| (Chou et al., 2012) | Review | One reason that current practice is not consistent with the evidence is patient expectations. Patients want a specific diagnosis to explain their symptoms. | -Beliefs  -Finding the cause | -Preferences & expectations  -Biomedical and care-related factors |
| (Chou et al., 2012) | Review | In addition, patients may equate a decision to not obtain imaging or provide a precise diagnosis with low-quality or suboptimal care, or interpret the decision to not perform imaging as implying that their pain is not legitimate or important | -Beliefs | -Preferences & expectations |
| (Chou et al., 2012) | Review | In patients with chronic back pain, the desire for diagnostic tests is a frequent reason for repeat office visits | -Chronic problem | -Biomedical and care-related factors |
| (Chou et al., 2012) | Review | In one study, an increased likelihood of obtaining low back pain imaging was strongly associated with how intensely patients believed imaging was necessary | -Beliefs | -Preferences & expectations |
| (Chou et al., 2012) | Review | Imaging decisions may themselves affect patient expectations, because those who undergo imaging for one episode of low back pain may come to expect it for future episodes. One trial showed  that patients randomized to routine imaging became more likely to believe it was necessary compared with those randomized to an educational intervention without routine imaging, despite no beneficial effects on clinical outcomes. | -Experiences | -Preferences & expectations |
| (Chou et al., 2012) | Review | Low back pain imaging is often a routine part of the evaluation in workman’s compensation and disability cases, despite the absence of evidence that it improves outcomes in these settings. | -Present and future income effects  -Disability  -Perceived insecurity | -Economic factors  -Biomedical and care-related factors  -Emotions |
| (De Carvalho et al., 2021) | Cross-sectional survey | X-rays of the lumbar spine are indicated when a patient is non-responsive to 4 weeks of conservative treatment for LBP | -Chronic problem | -Biomedical and care-related factors |
| (De Carvalho et al., 2021) | Cross-sectional survey | There is a role for the use of lumbar spine xrays in the evaluation of patients with chronic LBP (> 3 months duration), even in the absence of red flags for serious diseases | -Chronic problem | -Biomedical and care-related problems |
| (De Carvalho et al., 2021) | Cross-sectional survey | They would be likely to refer LBP patients for x-ray because patients often expect them to do so. | -Beliefs | -Preferences & expectations |
| (De Carvalho et al., 2021) | Cross-sectional survey | X-rays of the lumbar spine are useful to confirm the diagnosis and to direct appropriate treatment of LBP | -Confirmation bias | -Cognitive bias |
| (Espeland et al., 2001) | Mixed methods | A larger proportion of inappropriately than appropriately referred patients considered radiography very important | -Beliefs | -Preferences & expectations |
| (Espeland et al., 2001) | Mixed methods | Men rated radiography as very important more frequently than women, and such a rating also occurred more often among patients with worsening of symptoms | -Pain (severity) | -Biomedical and care-related factors |
| (Espeland et al., 2001) | Mixed methods | Patients often referred to symptoms and clinical history when giving their views. They said that the radiologic examination was important because their pain was bothersome, worsening, long lasting, or relapsing or because of recent trauma, previous malignancy, failed treatment, or family history of rheumatism or malignancy. | -Experiences  -Pain (severity)  -Chronic problem  -Social network  -Comorbidity | -Preferences & expectations  -Biomedical and care-related factors  -Biomedical and care-related factors  -Socio-cultural factors  -Biomedical and care-related factors |
| (Espeland et al., 2001) | Mixed methods | Some patients simply thought that they needed radiographs “because my back hurts!” | -Pain | -Biomedical and care-related factors |
| (Espeland et al., 2001) | Mixed methods | Several patients said that the radiologic examination was important because it had been recommended by their general practitioners, although they did not always know why the practitioners had found the examination appropriate. | -Acceptance of care recommended by the provider | -Interaction with the provider |
| (Espeland et al., 2001) | Mixed methods | Some patients said that their physiotherapist, chiropractor, or homeopath had suggested that they should have radiographs because (further) treatment would otherwise be risky or difficult | -Acceptance of care recommended by the provider | -Interaction with the provider |
| (Espeland et al., 2001) | Mixed methods | Nevertheless, she considered the examination very important “to find out what is wrong.” | -Finding the cause  -Imperative knowledge bias | -Biomedical and care-related factors  -Cognitive bias |
| (Espeland et al., 2001) | Mixed methods | The referral for radiography also gave patients a small, but needed, hope for a positive change in a difficult situation: “Radiographs were the last resort, the physician couldn’t give any more help”; or a confirmation that the pain was real: “No one believes that I have pain. It feels good to have radiographs to confirm the reason why I have pain.” | -Hope  -Confirmation bias | -Emotions  -Cognitive bias |
| (Espeland et al., 2001) | Mixed methods | Need for Certainty and Reassurance. Several patients were uncertain and anxious about their pain. They regarded the radiologic examination important so that they could“ stop worrying” and “stop thinking about it.” | -Perceived insecurity  -Fear and Anxiety  -Pain | -Emotions -Emotions  -Biomedical and care-related factors |
| (Espeland et al., 2001) | Mixed methods | The examination might reduce their worries by excluding diseases and by providing an explanation of their symptoms: “It means everything to me, to get some answers, not just question marks.” | -Perceived insecurity  -Finding the cause | -Emotions  -Biomedical and care-related factors |
| (Espeland et al., 2001) | Mixed methods | Patients often thought that the radiographs were needed to rule out serious disease: “That, in itself, can make you better.” | -Risk aversion | -Cognitive bias |
| (Espeland et al., 2001) | Mixed methods | Some patients said that they had a friend or a family member in whom serious disorder had been overlooked for a long time and considered it “better to have radiographs too early than too late.” | -Social network  -Anticipated regret aversion  -Perceived insecurity | -Socio-cultural factors  -Cognitive bias  -Cognitive bias |
| (Espeland et al., 2001) | Mixed methods | Many patients said that radiography was important because they wanted to know what was wrong and why they had pain and because they wished to “put a name to it.” | -Finding the cause  -Imperative knowledge bias  -Confirmation bias | -Biomedical and care-related factors  -Cognitive bias  -Cognitive bias |
| (Espeland et al., 2001) | Mixed methods | Some of these patients were dissatisfied with the physician’s explanation of their symptoms and were seeking other explanations: “It is quite hopeless when you are not told what it is. I am willing to try everything to find out”; “I have to live with it, the physician says, but I want to know what it is.” | -Finding the cause | -Biomedical and care-related factors |
| (Espeland et al., 2001) | Mixed methods | Patients commonly believed or hoped that the radiologic examination could show the reason for their pain and mentioned several specific conditions that they considered important and possible for the examination to clarify: fractures, brittle bones, bad posture, Bekhterev syndrome (i.e., ankylosing spondylitis), wear and tear,  worn discs, and trapped nerves. Some patients wanted to check whether calcifications had worsened. | -Beliefs  -Finding the cause  -Comorbidity | -Preferences & expectations  -Biomedical and care-related factors  -Biomedical and care-related factors |
| (Espeland et al., 2001) | Mixed methods | Radiography was sometimes considered more reliable than clinical investigation: “You can’t find out anything without radiographs”; “The physician can’t see right through me.” | -Beliefs  -Finding the cause | -Preferences & expectations  -Biomedical and care-related factors |
| (Espeland et al., 2001) | Mixed methods | Some patients who were dissatisfied with the general practitioner’s explanation of their symptoms believed that the radiologic examination could provide a better explanation. | -Lack of trust in the provider | -Interaction with the provider |
| (Espeland et al., 2001) | Mixed methods | One patient wanted radiography to resolve disagreement between two physicians regarding the reason for the pain. | -Practice variation  -Perceived insecurity | -Interaction with the provider  -Emotions |
| (Espeland et al., 2001) | Mixed methods | Patients often believed or hoped that the radiologic examination, by establishing a diagnosis or an explanation or by aiding the treatment of their condition, would make it easier to “get better,” “go back to work,” or “start playing football again.” | -Beliefs | -Preferences & expectations |
| (Espeland et al., 2001) | Mixed methods | Some patients were more ambiguous in their hope for improvement but considered radiography helpful in deciding “whether something could be done” or not. | -Beliefs | -Preferences & expectations |
| (Espeland et al., 2001) | Mixed methods | Radiography was expected to help decisions about operation, chiropractic therapy, and physiotherapy. | -Beliefs | -Preferences & expectations |
| (Espeland et al., 2001) | Mixed methods | Some patients stated that the radiologic examination was required for referral to a specialist or to get sickness certification or disability pension. | -Beliefs  -Present and future income effects | -Preferences & expectations  -Economic factors |
| (Espeland et al., 2001) | Mixed methods | Asking for radiography may indicate a need for emotional support, and physicians should consider and try to meet this need when eliminating inappropriate self-referrals. | -Support from the provider | -Interaction with the provider |
| (Jenkins et al., 2016) | Survey | X-rays or scans are necessary to get the best medical care for low back pain and 48.0% of respondents agreed or strongly agreed that everyone with low back pain should have spine imaging. | -Beliefs | -Preferences & expectations |
| (Jenkins et al., 2016) | Survey | Belief of increased need for imaging was seen in patients who: were older; had a lower Educational background; Had a non-European Or non-Anglo-Saxon cultural background; had received previous imaging for LBP; and had a lower Back Beliefs Questionnaire score. | -Stage of life  -Low education level  -Cultural background  -Experiences  -Beliefs | -Socio-cultural factors  -Knowledge-related factors  -Socio-cultural factors  -Preferences & expectations -Preferences & expectations |
| (Jenkins et al., 2022) | Cross-sectional study | Participants were more likely to believe that imaging was important in the management of LBP and to want an imaging referral at the initial consult if they had a longer duration of LBP, history of previous imaging for LBP, and a lower level of education. | -Beliefs  -Chronic problem  -Experiences  -Low education level | -Preferences & expectations  -Biomedical and care-related factors  -Socio-cultural factors  -Knowledge-related factors |
| (Kiel et al., 2022) | Cross-sectional study | A biomechanical understanding of LBP and lack of knowledge of the role of psychosocial  factors may cause patients to expect imaging diagnostics rather than psychological screening as part of the workup of nonspecific LBP | -Finding the cause | -Biomedical and care-related factors |
| (Kiel et al., 2022) | Cross-sectional study | This may imply that patients in our study without previous imaging need reassurance in the form of imaging before accepting psychosocial influences on their LBP. | -Perceived insecurity | -Emotions |
| (Kiel et al., 2022) | Cross-sectional study | Studies report that patients expected diagnostic tests such as imaging in order to receive a diagnosis of LBP | -Beliefs  -Finding the cause | -Preferences & expectations  -Biomedical and care-related factors |
| (Larijani et al., 2021) | Focus group interview | Patients mostly thought imaging is required to diagnose LBP. A patient partner said: “imaging was [important] to diagnose my seven compression fractures in my back”. | -Beliefs  -Finding the cause | -Preferences & expectations  -Biomedical and care-related factors |
| (Larijani et al., 2021) | Focus group interview | Most participants asserted their belief that having imaging was important for treatment of LBP, and they indicated that imaging freed them from the stress of not knowing what was wrong. | -Beliefs  -Perceived insecurity  -Imperative knowledge bias | -Preferences & expectations  -Emotions  -Cognitive bias |
| (Larijani et al., 2021 | Focus group interview | In all cases, patient participants reported that their imaging referrals were requested by family physicians or specialists, except one case in a rural area where imaging (X-ray) was ordered by a physiotherapist. | -Acceptance of care recommended by provider | -Interaction with the provider |
| (Larijani et al., 2021 | Focus group interview | In some cases, participants felt that imaging was ordered only because their doctor was  rushed and only had time for a very short consultation. It was suggested that a thorough examination of a patients could prevent unnecessary imaging: “I learned that my three major imaging tests were all unnecessary because you don’t need imaging tests to diagnose [my syndrome], you just need to examine the patient” | -Lack of time | -Interaction with the provider |
| (Larijani et al., 2021) | Focus group interview | The other participant also added, “imaging was important and I wasn’t concerned at all about the risks of the X-ray because I wanted something to happen with my pain”. | -Imperative action bias | -Cognitive bias |
| (Larijani et al., 2021) | Focus group interview | On the other hand, two LBP patients who have had multiple imaging tests thought the advantages of imaging definitely outweighed the disadvantages: “I went for an X-ray, where this time, I asked my doctor to give it to me because [ . . . ] I wanted to see what was going on because it seemed to have gotten worse with the nerve pain down my leg.” | -Asymmetry of risks and benefits  -Finding the cause of the problem  -Pain (severity) | -Cognitive bias  -Biomedical and care-related factors  -Biomedical and care-related factors |
| (Larijani et al., 2021) | Focus group interview | Similarly, one patient participant stated: “I thought it was just obviously necessary because I had been in a car accident and then I was having back pain. But I think the second time that I had [imaging] done, it just kept coming back and getting worse, and depending on what I was doing, I felt I should have another [imaging test] just to make sure there wasn’t something wrong. But I haven’t had another [imaging test] since then.” | -Beliefs  -Chronic problem  -Perceived insecurity | -Preferences & expectations  -Biomedical and care-related factors  -Emotions |
| Lim et al. (2019) | Systematic Review | Findings included participants’ needs for an ‘exact’ diagnosis of LBP for a variety of reasons, including the validation and legitimisation of patients’ symptoms | -Confirmation bias | -Cognitive bias |
| Lim et al. (2019) | Systematic Review | Some participants believed that their pain could not be substantiated without a specific diagnosis | -Pain  -Finding the cause | -Biomedical and care-related factors -Biomedical and care-related factors |
| Lim et al. (2019) | Systematic Review | Additionally, patients felt that a lack of a diagnosis indicated that health professionals did not know what they were doing, resulting in a perceived lack of a therapeutic relationship with the health practitioner. | -Lack of trust in the provider | -Interaction with the provider |
| Lim et al. (2019) | Systematic Review | Participants in Ong’s study required a diagnosis as the starting point for therapy | -Follow-up treatment decisions | -Biomedical and care-related factors |
| Lim et al. (2019) | Systematic Review | Eight papers found that participants believed imaging to be an essential component of the assessment of LBP. This was thought to be required and necessary to confirm the diagnosis and identify structural damage and the cause of LBP. | -Beliefs  -Confirmation bias  -Finding the cause | -Preferences & expectations  -Cognitive bias  -Biomedical and care-related factors |
| Lim et al. (2019) | Systematic Review | Participants believed accurate diagnosis could only be achieved through detailed examination (assessment though physical touch) and/or imaging (X-rays and MRI). | -Beliefs | -Preferences & expectations |
| Lim et al. (2019) | Systematic Review | Need imaging tests to provide reassurance and confirmation of diagnosis: Xray was to establish whether…. was just a pulled muscle or whether it was a herniated disc | -Perceived insecurity  -Confirmation bias | -Emotions  -Cognitive bias |
| Lim et al. (2019) | Systematic Review | Need tests or imaging to confirm legitimacy of LBP: I kind of cried with relief when I saw what was wrong. but you don’t want this unexplained pain. | -Confirmation bias  -Imperative knowledge bias | -Cognitive bias  -Cognitive bias |
| (Lin et al., 2017) | Cross-sectional survey | Emergency physicians reported patient and family expectations as the most important reason for providing antibiotics for sinusitis, imaging in nontraumatic back pain, and head CT after minor head injury. | -Beliefs  -Social network | -Preferences & expectations  -Socio-cultural factors |
| (Maher et al., 2017) | Review | Both patients’ and clinicians’ erroneous beliefs that imaging is essential in the management of low back pain are potential drivers of unnecessary imaging. | -Beliefs | -Preferences & expectations |
| (Maher et al., 2017) | Review | This discussion is important because many patients expect imaging to be done and some also worry that their low back pain is a sign of something serious. | -Beliefs  -Perceived insecurity | -Preferences & expectations  -Emotions |
| (Maher et al., 2017) | Review | Identifying and addressing any misconceptions the patient might have either by providing the patient with the opportunity to ask questions or by probing questions, is important, because misconceptions about low back pain are quite common and could adversely affect outcome. These misconceptions can include fear avoidance beliefs, which are more common in those who seek care, and patient expectations of poor recovery | -Beliefs  -Fear & anxiety | -Preferences & expectations  -Emotions |
| (Oza et al., 2022) | Mixed Methods | Students also found the particular circumstances of the patient (such as work or family obligations, or the fact that the patient was presenting in considerable pain) as adding to the challenge of responding to the patient’s request: The patient clearly did not want to just wait until she feels better since she has a life and three children to take care of, so it was difficult to tell her to keep doing what she's doing and just manage the pain with OTC medications and rest. | -Social network  -Present and future income effects  -Pain | -Socio-cultural factors  -Economic factors  -Biomedical and care-related factors |
| (Oza et al., 2022) | Mixed Methods | At School A, where the patient’s occupation was as medical assistant in an orthopedic surgeon’s office, the circumstance of the patient’s perceived medical knowledge was cited by students as posing a challenge: I wanted to give the patient a clear answer as to the cause of her pain, and it was challenging to refuse a request that she felt might be indicated to treat her pain adequately. This patient, with a back-ground in healthcare, knew what to ask for, which made me uncomfortable as a student doctor with limited experience. | -Over-informed  -Finding the cause  -Pain | -Knowledge-related factors  -Biomedical and care-related factors  -Biomedical and care-related factors |
| (Scherer et al., 2019) | Survey | Participants with a stronger maximizing orientation were significantly more likely to prefer the active intervention relative to participants with a minimizing orientation in all scenarios. | -Beliefs  -Extension bias | -Preferences & expectations  -Cognitive bias |
| (Scherer et al., 2019) | Survey | Parental status significantly moderated the effect of maximizing minimizing preferences in only 1 of the scenarios involving decisions for children. This interaction indicated that the MMS was more predictive of deciding to go to the emergency room among parents than nonparents. | -Stage of life | -Socio-cultural factors |
| (Scherer et al., 2019) | Survey | In addition, maximizers and minimizers both expressed a desire for a low-benefit MRI for low back pain, while desire to receive surgery for plantar fasciitis or continue colorectal cancer screening after age 80 was minimal for both groups. | -Beliefs | -Preferences & expectations |
| (Sharma et al., 2020) | Review | Patients and clinicians in primary care believed diagnostic imaging has benefits and may not consider harm. | -Beliefs  -Asymmetry of risks and benefits | -Preferences & expectations  -Cognitive bias |
| (Sharma et al., 2020) | Review | Patients and clinicians in primary care believed diagnostic imaging is a useful test for locating the source of non-specific ow back pain. | -Beliefs  -Finding the cause | -Preferences & expectations -Biomedical and care-related factors |
| (Sharma et al., 2020) | Review | Clinicians believed absence of a serious pathology on imaging is reassuring for patients, but patients expressed that this is not the case | -Perceived insecurity | -Emotions |
| (Sharma et al., 2020) | Review | Patients with chronic low back pain believed  pathoanatomical findings on diagnostic imaging provide evidence that pain is real | -Beliefs  -Confirmation bias  -Pain | -Preferences & expectations  -Cognitive bias  -Biomedical and care-related factors |
| (Taylor & Bishop, 2020) | Review | There is overwhelming evidence from these studies that patients often desire imaging and feel it is necessary and appropriate for the management of their LBP. | -Beliefs | -Preferences & expectations |
| (Taylor & Bishop, 2020) | Review | The majority of patients included in the qualitative papers placed significant emphasis on the belief that imaging would help to diagnose their problem and guide subsequent treatment. | -Beliefs  -Follow-up treatment decisions | -Preferences & expectations  -Biomedical and care-related factors |
| (Taylor & Bishop, 2020) | Review | Espeland et al. found that patients expected imaging to establish a diagnosis and guide treatment, to show if something could be done or not, and to guide referral to specialists. | -Beliefs  -Follow-up treatment decisions | -Preferences & expectations  -Biomedical and care-related factors |
| (Taylor & Bishop, 2020) | Review | Hoffman et al. described how patients felt imaging would determine the cause of the pain and find a ‘cure’ for it. | -Beliefs  -Finding the cause of | -Preferences & expectations  -Biomedical and care-related factors |
| (Taylor & Bishop, 2020) | Review | Rhodes et al. describe patient narratives where there is a full expectation that the ‘deviation from normal would show up and is susceptible to repair’. | -Beliefs | -Preferences & expectations |
| (Taylor & Bishop, 2020) | Review | Scher’s et al. describe how some patients felt an X-ray would ‘show more’ than examination alone. | -Beliefs | -Preferences & expectations |
| (Taylor & Bishop, 2020) | Review | Two papers describe how patients feel that imaging is needed for confirmation that their pain is real. Rhodes et al. describes in more depth how patients feel that in absence of a biomedical diagnosis, the suggestion must be that the pain is ‘in the mind’. | -Beliefs  -Confirmation bias  -Pain | -Preferences & expectations  -Cognitive bias  -Biomedical and care-related factors |
| (Taylor & Bishop, 2020) | Review | Reassurance was also described as a consequence of having imaging with Espeland et al. and Hoffman et al. describing how patients wanted [reassurance](https://www.sciencedirect.com/topics/medicine-and-dentistry/reassurance) that their pain was not anything serious, although ‘serious’ was normally suggested to be conditions such as a ‘bulging disc’ rather than pathologies considered to be medically serious such as tumour or infection. | -Perceived insecurity  -Pain | -Emotions  -Biomedical and care-related factors |
| (Taylor & Bishop, 2020) | Review | Wilson et al. found that difficulty with costs, insurance type, income, age, sex, smoking status, history of cancer, [sciatica](https://www.sciencedirect.com/topics/nursing-and-health-professions/sciatica) and [back pain](https://www.sciencedirect.com/topics/nursing-and-health-professions/backache) [chronicity](https://www.sciencedirect.com/topics/nursing-and-health-professions/chronicity) were not correlated with [radiology](https://www.sciencedirect.com/topics/medicine-and-dentistry/radiology) utilisation, whereas patients with [osteoporosis](https://www.sciencedirect.com/topics/nursing-and-health-professions/osteoporosis) were significantly more likely to have imaging which may be warranted due to the increased index of suspicion of red flag pathology. | -Comorbidity | -Biomedical and care-related factors |
| (Taylor & Bishop, 2020) | Review | Espeland et al. found that patients were more likely to want imaging if pain was long-lasting, bothersome or worsening and Hoffman et al. found that this was also true if pain was severe. | -Pain (severity)  -Chronic Problem | -Biomedical and care-related factors  -Biomedical and care-related factors |
| (Taylor & Bishop, 2020) | Review | Wilson et al. also found that patients with higher levels of pain were more likely to receive imaging whereas Jenkins et al. found there was no link between patient desire for imaging and current LBP and level of worst LBP intensity | -Pain (severity) | -Biomedical and care-related factors |
| (Taylor & Bishop, 2020) | Review | Hoffman et al. also found that influences from family, friends and other HCPs, specially [chiropractors](https://www.sciencedirect.com/topics/nursing-and-health-professions/chiropractor) and [osteopaths](https://www.sciencedirect.com/topics/nursing-and-health-professions/osteopathic-physician) led to a desire for imaging as did having prior treatment for LBP. | -Social network  -Acceptance of care recommended by provider  -Experiences | -Socio-cultural factors  -Interaction with the provider  -Preferences & expectations |
| (Taylor & Bishop, 2020) | Review | Hermoni et al. found that many patients denied imaging by their GP sought it elsewhere. | -Consumerism | -Economic factors |
| (Taylor & Bishop, 2020) | Review | Schers et al. found that patients who wanted an X-ray would expect their GP to give into their demands if they asked for it. | -Beliefs | -Preferences & expectations |
| (Taylor & Bishop, 2020) | Review | An account from a patient by Rhodes et al. describes how the patient initiated referral for imaging by continuing to ask for it until it was received. This appeared to stem from the patient’s doubt that the examination or explanation she had previously had, was sufficient to find her problem. This doubt in clinicians’ explanations or examination was also found by Espeland et al. and Schers et al. | -Lack of trust in the provider  -Finding the cause | -Interaction with the provider  -Biomedical and care-related factors |
| (Wilson et al., 2001) | Cross-sectional study | The radiology preference score was significantly related to radiology utilization, with patients in the fourth quartile of the preference score much more likely to have a radiological study compared with those in the first quartile. | -Beliefs | -Preferences & expectations |
| (Wilson et al., 2001) | Cross-sectional study | Pain severity (“bothersomeness”) was also significantly associated with utilization, with patients in the first quartile having more radiological studies than those in the first quartile. | -Pain (severity) | -Biomedical and care-related factors |
| (Wilson et al., 2001) | Cross-sectional study | Patients who reported osteoporosis more often had radiological studies than whose without osteoporosis | -Comorbidity | -Biomedical and care-related factors |

Appendix 3 Definitions of factors used in this study based on the causal loop diagram – demand for low back pain imaging

| **Core theme** | **Factors** | **Definition** |
| --- | --- | --- |
| Biomedical and care-related factors | Unidentifiable cause | When patients search for the cause of their (subjectively) experienced pain but are not able to find it. |
| Biomedical and care-related factors | Chronic pain | Long-lasting or recurring pain experienced by patients with low back pain. (According to the literature this was often the case when LBP is experienced for longer than 12 weeks. |
| Biomedical and care-related factors | Acute pain | Suddenly felt pain experienced by patients with low back pain. The duration of symptoms last longer than 6 weeks |
| Biomedical and care-related factors | Stress | Stress is a personal response to internal or external factors that activate other psychological and physical responses needed to prepare for upcoming challenging situations |
| Biomedical and care-related factors | Severity of low back pain complaints | The severity of low back pain encompasses the intensity of the pain experienced by these patients. |
| Biomedical and care-related factors | Reduced strength | Diminished muscle strength or performance as a consequence of disabilities caused by LBP. |
| Biomedical and care-related factors | Disability | A functional impairment caused by a patient´s LBP severity. |
| Biomedical and care-related factors | Comorbidity | In the context of low back pain, patients with LBP may suffer from other chronic diseases, caused by or closely related to their low back pain. |
| Economic factors | Consumerism | When patients shop around to receive their preferred or desired care by requesting this from other (care) providers. |
| Economic factors | Marketing influences | Success stories in magazines of other patients that were able to determine the cause of their pain through LBP imaging. |
| Economic factors | Income-related concerns | Income related or financial worries assumed to be caused by the disability of LBP patients |
| Knowledge-related factors | Patients’ unawareness | When LBP patients do not know what causes their LBP. |
| Knowledge-related factors | Knowledge gaps in providers’ medical training | Absence of, or a low level of knowledge regarding medical guidelines and treatment of non-specific LBP. |
| Socio-cultural factors | Stage of life | Stage of life encompasses age and health-related problems associated with aging |
| Socio-cultural factors | Cultural background influence | The influence of foreign medical practices that influence patients to demand low-value care in the Netherlands |
| Socio-cultural factors | Entitlement to care | When LBP patients perceive access to the diagnostical service of imaging as their right. This factor was argued to be caused by the influence of the patient's social network |
| Socio-cultural factors | Influence of social network | Experiences shared by friends, family, and relatives receiving care in similar situations |
| Preferences and expectations | Patients’ expectations | Anticipating or holding a strong personal belief to receive imaging for LBP. |
| Preferences and expectations | Patients’ experiences | Previous experiences with imaging were thought to shape patients' expectations about similar care in the future. |
| System factor / interaction with the provider | Practice variation | Practice variation refers to the differences in treatments, services, or clinical recommendations that patients with low back pain (LBP) receive from healthcare providers, despite having similar clinical presentations. For example, patients would hear multiple differing explanations of what could caused their pain and how this should be treated |
| Interaction with the provider | Adherence to medical guidelines by provider | Degree to which providers may comply with the medical guidelines and evidence-based care, which indicate against imaging. |
| Interaction with the provider | Trust in the provider | The ability to feel reassured when relying on the physician. |
| Interaction with the provider | Interaction with the provider | The engagement and communication between patient and provider during a consultation |
| Cognitive biases | Confirmation bias | A tendency of patients to try and seek more information about their LBP to prove that the pain is real. |
| Cognitive biases | Imperative action bias | A tendency to think that if preferred care does not help, then this care will also not hurt patients and, therefore, it is better to do something instead of nothing. |
| Cognitive biases | Imperative knowledge bias | A tendency to think that knowing more about an uncertain health status is better remaining ignorant or knowing less. |
| Emotions | Fear and anxiety | In this context, fear may arise from uncertainty about the cause of the pain. However, it is also linked to the fear of becoming immobilized or of limiting movement due to concerns about injury or increased pain. |
| Emotions | Perceived insecurity | Uncertainty, fears and doubts felt by patients with low back pain. |
| Emotions | Dissatisfaction and rejection of evidence and recommended care | An emotional response / outcome caused by not receiving the care (i.e., imaging of LBP) believed necessary to diagnose and treat LBP. Patients displaying this response were expected to disregard recommended care offered by their physician. |
| Demand outcomes | Denial and/or deferral of imaging by provider | When providers deny or defer patients' demand for LBP imaging, patients may receive other recommended care option |
| Demand outcomes | Low back pain imaging | When patients receive imaging (after demanding or requesting this) |
| Dependent variable | Low back pain imaging demand | The scenario where patients would prefer, seek, or request any form of LBP imaging, such as CT-scans, radiography, and MRI’s. |

Appendix 4 Factors included in the final CLD on patients’ demand for low-value care

| Core theme | Factors | Definition |
| --- | --- | --- |
| Biomedical factors | Chronic problem | A persisting or reoccurring medical problem, symptom, or disease. |
| Biomedical factors | Salient health problem | A noticable or relevant health issue, symptom, or disease. |
| Biomedical factors | Severity of health problem | The intensity of the experienced health issue. |
| Cognitive bias | Anticipated regret aversion | A tendency to avoid possible regret in the future by demanding unnecessary care in the present. |
| Cognitive bias | Asymmetry of risks and benefits | A tendency to overestimate the benefits and underestimate the risks of low-value care treatments. |
| Cognitive bias | Confirmation bias | A tendency to seek or interpret medical information or care recommendations that correspond to their viewpoints, and disregard or dispute contradicting recommendations and information. |
| Cognitive bias | Imperative action bias | A tendency to feel obliged to act, because action is better than inaction. |
| Cognitive bias | Imperative knowledge bias | A tendency to gain more information related to their health status, because this is better than being ignorant. |
| Cognitive bias | Publication bias | A tendency of researchers or publishers to focus on the positive research results and to neglect or negative or non-significant results. |
| Cognitive bias | Risk aversion | A tendency of patients to avoid or reduce uncertainties, dangerous situations, and risks as much as possible. |
| Economic factors | Consumerism | The idea that healthcare is perceived as a consumption good and patients can, therefore, shop around by visiting various healthcare providers to receive their desired care. |
| Economic factors | Health insurance payments | Contributions that are paid to be insured for medical expenses. |
| Economic factors | Income abundance | Having a substantial amount of wealth or financial prosperity that can be spent on unnecessary treatments. For example, spending money on an unnecessary full body scan. |
| Economic factors | Marketing by media | Presenting information in such a manner that it generates profits for the presenting actor and causes patients to demand low-value care. |
| Emotions | Fear and anxiety | When patients are afraid of uncertainties, such as illnesses, overlooking potential diseases, or possible outcomes of diseases. |
| Emotions | Loss of control | To assert control over their situation by displaying an active role in their decision-making process. |
| Emotions | Perceived insecurity | Patients feel uncertain about their health status. |
| Interaction with the provider | Ability to act of provider | The possibility of the healthcare provider to provide care. |
| Interaction with the provider | Authority acceptance | Acknowledging and embracing recommendations and care provided by the healthcare provider |
| Interaction with the provider | Communication of uncertainty by providers | When healthcare providers discuss uncertainties with their patients related to the patient's experienced health problem or symptoms. |
| Interaction with the provider | Interaction with the provider | The process where patients and providers communicate with eachother. |
| Preferences and expectations | Patient expectations | When patients think or expect that their healthcare provider wants to povide care. |
| Interaction with the provider | Perception of integrity of providers | Perception of patients about the integrity of healthcare providers. |
| Interaction with the provider | Perception of medical competency | Perception of patients about the capacities of healthcare providers. |
| Interaction with the provider | Practice variation | Differences in recommendations of care by various healthcare providers |
| Preferences and expectations | Provider expectations | When healthcare providers think or expect that their patients want to receive care. |
| Interaction with the provider | Trust in the provider | The reliance and belief that patients have in their healthcare provider. |
| Knowledge-related factors | Demand of low-educated patients | When low-educated patients demand low-value care. |
| Knowledge-related factors | Health literacy | The ability of patients to comprehend medical or health-related information. |
| Knowledge-related factors | High education | Patients with a degree that is valued as above average. |
| Knowledge-related factors | Lack of evidence | When information about the harmfull or marginal effect of low-value care is absent or insufficient. |
| Knowledge-related factors | Not accepting the concept of overuse | Rejecting or questioning the credibility of evidence-based recommendations and overuse messaging to avoid low-value care interventions, such as overtreatment and overdiagnosis |
| Knowledge-related factors | Outspokenness | The assertiveness and vocallness of patients to demand low-value care. |
| Knowledge-related factors | Quality of distributed information | The quality of Information about treatments and services that is provided to patients. |
| Knowledge-related factors | Unawareness | Lacking realization and information that certain treatments have no or only marginal health benefits, and are possibly even harmful. |
| Preferences and expectations | Beliefs | Patients’ beliefs are formed by personal convictions, which function as cornerstones that shape patients’ attitudes, preferences, and expectations towards medical care. These beliefs tend to make patients susceptible to perceive low-value care as a default or necessary treatment, which causes these patients to demand low-value care |
| Socio-cultural factors | Experiences of social network | When relatives and acquaintances pressure or encourage patients to seek low-value care by sharing their personal observations or experiences. |
| Socio-cultural factors | Cultural background influence | The influence of foreign medical practices that influence patients to demand low-value care in the Netherlands |
| Socio-cultural factors | Entitlement to care | When patients consume unnecessary and excessive healthcare, because this is perceived as a right. |
| Socio-cultural factors | Practices | Medical-related customs or habits that are common for patients to receive care |
| Socio-cultural factors | Stage of life | Age- and life phase related factors that result in patients’ low-value care demand. |
| Dependent variable | Low-value care demand | When patients demand care that provides little to no health benefits and can be harmful to patients. |


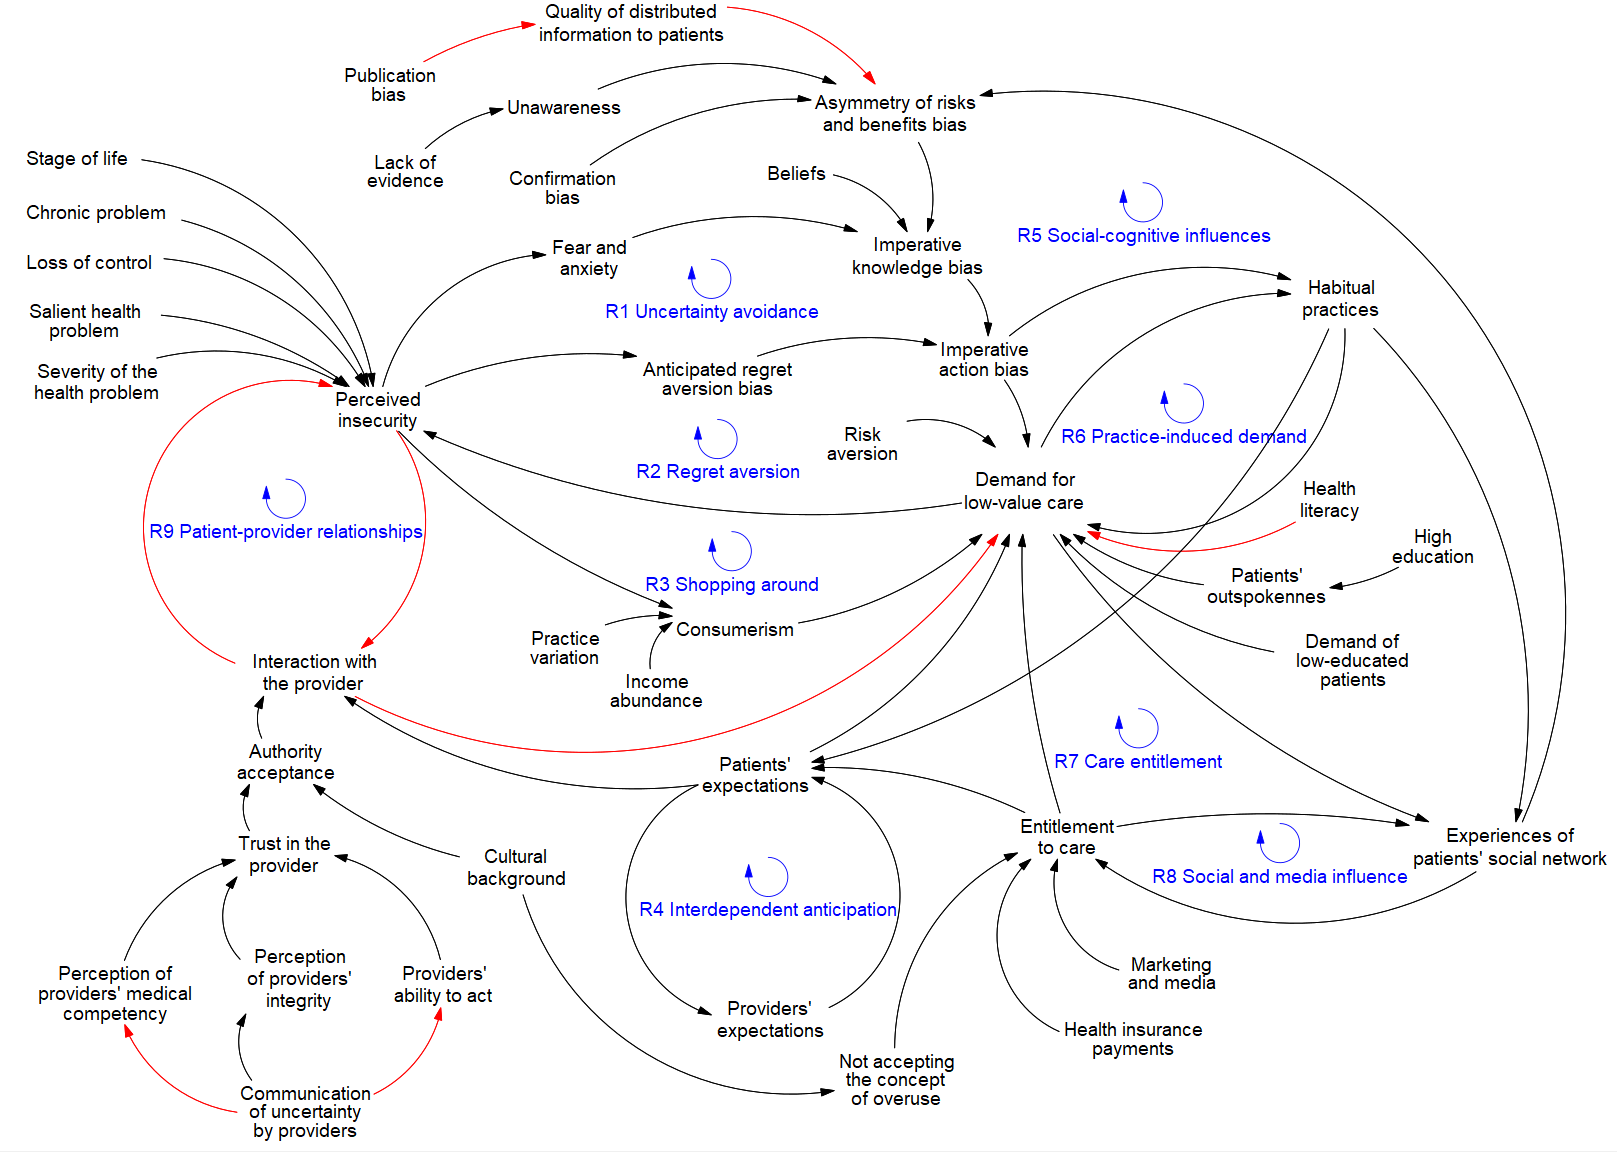
Appendix 4 - Final causal loop diagram on patients’ demand for low-value care
