# Supplementary material for: Mechanisms contributing to patients’ demand for low back pain imaging: a complex systems approach
Source: Research Square preprint supplement (doi:10.21203/rs.3.rs-8393306/v1), 2026-01-25
Supplement: Supplementary file 5 [file f233995b97769467c318642c.docx]

Appendix 4 Definitions of factors used in this study based on the causal loop diagram

| **Core theme** | **Factors** | **Definition** |
| --- | --- | --- |
| Biomedical and care-related factors | Unidentifiable cause | When patients search for the cause of their (subjectively) experienced pain but are not able to find it. |
| Biomedical and care-related factors | Chronic pain | Long-lasting or recurring pain experienced by patients with low back pain. (According to the literature this was often the case when LBP is experienced for longer than 12 weeks. |
| Biomedical and care-related factors | Acute pain | Suddenly felt pain experienced by patients with low back pain. The duration of symptoms last longer than 6 weeks |
| Biomedical and care-related factors | Stress | Stress is a personal response to internal or external factors that activate other psychological and physical responses needed to prepare for upcoming challenging situations |
| Biomedical and care-related factors | Severity of low back pain complaints | The severity of low back pain encompasses the intensity of the pain experienced by these patients. |
| Biomedical and care-related factors | Reduced strength | Diminished muscle strength or performance as a consequence of disabilities caused by LBP. |
| Biomedical and care-related factors | Disability | A functional impairment caused by a patient´s LBP severity. |
| Biomedical and care-related factors | Comorbidity | In the context of low back pain, patients with LBP may suffer from other chronic diseases, caused by or closely related to their low back pain. |
| Economic factors | Consumerism | When patients shop around to receive their preferred or desired care by requesting this from other (care) providers. |
| Economic factors | Marketing influences | Success stories in magazines of other patients that were able to determine the cause of their pain through LBP imaging. |
| Economic factors | Income-related concerns | Income related or financial worries assumed to be caused by the disability of LBP patients |
| Knowledge-related factors | Patients’ unawareness | When LBP patients do not know what causes their LBP. |
| Knowledge-related factors | Knowledge gaps in providers’ medical training | Absence of, or a low level of knowledge regarding medical guidelines and treatment of non-specific LBP. |
| Socio-cultural factors | Stage of life | Stage of life encompasses age and health-related problems associated with aging |
| Socio-cultural factors | Cultural background influence | The influence of foreign medical practices that influence patients to demand low-value care in the Netherlands |
| Socio-cultural factors | Entitlement to care | When LBP patients perceive access to the diagnostical service of imaging as their right. This factor was argued to be caused by the influence of the patient's social network |
| Socio-cultural factors | Influence of social network | Experiences shared by friends, family, and relatives receiving care in similar situations |
| Preferences and expectations | Patients’ expectations | Anticipating or holding a strong personal belief to receive imaging for LBP. |
| Preferences and expectations | Patients’ experiences | Previous experiences with imaging were thought to shape patients' expectations about similar care in the future. |
| System factor / interaction with the provider | Practice variation | Practice variation refers to the differences in treatments, services, or clinical recommendations that patients with low back pain (LBP) receive from healthcare providers, despite having similar clinical presentations. For example, patients would hear multiple differing explanations of what could caused their pain and how this should be treated |
| Interaction with the provider | Adherence to medical guidelines by provider | Degree to which providers may comply with the medical guidelines and evidence-based care, which indicate against imaging. |
| Interaction with the provider | Trust in the provider | The ability to feel reassured when relying on the physician. |
| Interaction with the provider | Interaction with the provider | The engagement and communication between patient and provider during a consultation |
| Cognitive biases | Confirmation bias | A tendency of patients to try and seek more information about their LBP to prove that the pain is real. |
| Cognitive biases | Imperative action bias | A tendency to think that if preferred care does not help, then this care will also not hurt patients and, therefore, it is better to do something instead of nothing. |
| Cognitive biases | Imperative knowledge bias | A tendency to think that knowing more about an uncertain health status is better remaining ignorant or knowing less. |
| Emotions | Fear and anxiety | In this context, fear may arise from uncertainty about the cause of the pain. However, it is also linked to the fear of becoming immobilized or of limiting movement due to concerns about injury or increased pain. |
| Emotions | Perceived insecurity | Uncertainty, fears and doubts felt by patients with low back pain. |
| Emotions | Dissatisfaction and rejection of evidence and recommended care | An emotional response / outcome caused by not receiving the care (i.e., imaging of LBP) believed necessary to diagnose and treat LBP. Patients displaying this response were expected to disregard recommended care offered by their physician. |
| Demand outcomes | Denial and/or deferral of imaging by provider | When providers deny or defer patients' demand for LBP imaging, patients may receive other recommended care option |
| Demand outcomes | Low back pain imaging | When patients receive imaging (after demanding or requesting this) |
| Dependent variable | Low back pain imaging demand | The scenario where patients would prefer, seek, or request any form of LBP imaging, such as CT-scans, radiography, and MRI’s. |
